# Supplementary material for: Metallomics for drug development: a further insight into intracellular activation chemistry of a ruthenium(iii)-based anticancer drug gained using a multidimensional analytical approach
Source: Royal Society of Chemistry journal article supplement (doi:10.1039/c3mt00252g), 2013-10-30
Supplement: c3mt00252g.pdf [file c3mt00252g.pdf]

## Electronic supplementary information

# Metallomics for drug development: a further insight into intracellular activation chemistry of a ruthenium(III)-based anticancer drug gained by multidimensional analytical approach†

Magdalena Matczuk,<sup>a</sup> Monika Prządka,<sup>a</sup> Svetlana S. Aleksenko,<sup>b</sup> Zbigniew Czarnocki,<sup>c</sup> Katarzyna Pawlak,<sup>a</sup> Andrei R. Timerbaev\*<sup>b</sup> and Maciej Jarosz<sup>a</sup>

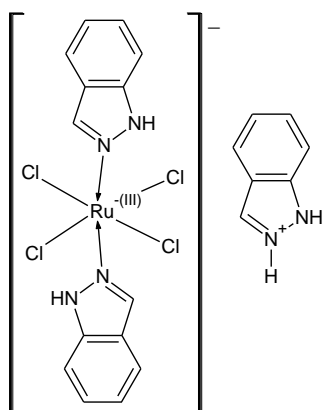

**Scheme S1.** Structural formula of the Ru drug.

**Table S1.** CE, ICP-MS, and ESI-MS/MS settings and operational parameters

| Parameter                                    | Setting                                                                                                      |
|----------------------------------------------|--------------------------------------------------------------------------------------------------------------|
| ICP-MS                                       |                                                                                                              |
| plasma gas flow rate, L min <sup>-1</sup>    | 15                                                                                                           |
| auxiliary gas flow rate, L min <sup>-1</sup> | 0.9                                                                                                          |
| sample cone                                  | Pt (1.0 mm orifice)                                                                                          |
| skimmer cone                                 | Pt (0.4 mm orifice)                                                                                          |
| plasma RF power, W                           | 1290                                                                                                         |
| isotopes monitored                           | <sup>100</sup> Ru, <sup>101</sup> Ru, <sup>102</sup> Ru, <sup>57</sup> Fe, <sup>72</sup> Ge, <sup>89</sup> Y |
| dwell time, ms                               | 100                                                                                                          |
| Interface                                    |                                                                                                              |
| spray chamber volume, mL                     | 5                                                                                                            |
| nebulizer gas flow rate, L min <sup>-1</sup> | 1.0                                                                                                          |
| CE                                           |                                                                                                              |

|                                            |                                                                                       |
|--------------------------------------------|---------------------------------------------------------------------------------------|
| Capillary                                  | fused-silica, inner diameter 75 $\mu\text{m}$ , length 70 cm (50 cm effective length) |
| Background electrolyte                     | 10 mM $\text{NaH}_2\text{PO}_4$ –10 mM $\text{Na}_2\text{HPO}_4$ , 4 mM NaCl, pH 6.0  |
| sample injection, mbar $\times$ s          | 300                                                                                   |
| voltage, kV                                | 25                                                                                    |
| current, $\mu\text{A}$                     | 28–30                                                                                 |
| sheath liquid                              | 1 mM phosphate buffer (pH 6.0), 0.4 mM NaCl, 20 $\mu\text{g L}^{-1}$ Ge               |
| <hr/>                                      |                                                                                       |
| ESI-MS/MS                                  |                                                                                       |
| syringe pump speed, $\mu\text{L min}^{-1}$ | 18                                                                                    |
| polarity                                   | positive (+), negative (-)                                                            |
| mode                                       | SCAN, Product Ion                                                                     |
| mass range, m/z                            | 50–1500                                                                               |
| ionization voltage, V                      | 2500 (+), 1500 (-)                                                                    |
| orifice voltage, V                         | 90                                                                                    |
| drying gas flow, $\text{L min}^{-1}$       | 8                                                                                     |
| drying gas temperature, $^\circ\text{C}$   | 300                                                                                   |
| nebulizer pressure, psi                    | 50                                                                                    |
| sheath gas flow, $\text{L min}^{-1}$       | 7                                                                                     |
| sheath gas temperature, $^\circ\text{C}$   | 350                                                                                   |
| nozzle voltage, V                          | 500                                                                                   |
| collision energy, eV                       | 20 or 30                                                                              |
| <hr/>                                      |                                                                                       |

### Conditions for capillary pretreatment

Prior to analysis, the capillary was conditioned with 0.1 M NaOH (10 min), a mixture of 0.1 M NaOH, methanol, and water (25/50/25, v/v/v) (5 min), water (5 min), and background electrolyte (10 min). After each analysis, the capillary was rinsed with the same solutions and in the same sequence for 1, 1, 1, and 3 min, respectively (with a 0.5 min pause between flushes). After flushing, the stability of the current ( $29\pm 1 \mu\text{A}$ ) was checked by applying a constant voltage of 25 kV for 30 s. The electrolyte was degassed in the ultrasonic bath and passed through a 0.45  $\mu\text{m}$  membrane filter before analysis.

## Measurement of EOF

The EOF was measured by means of UV-detected acetone (Fig. S1). Preliminary experiments carried out with and without the EOF marker indicated that the addition of a small amount of acetone to the incubation mixture before the CE run does not virtually affect the peak area and migration time of the adduct (variations below 3%). This allowed us to neglect possible denaturation effects.

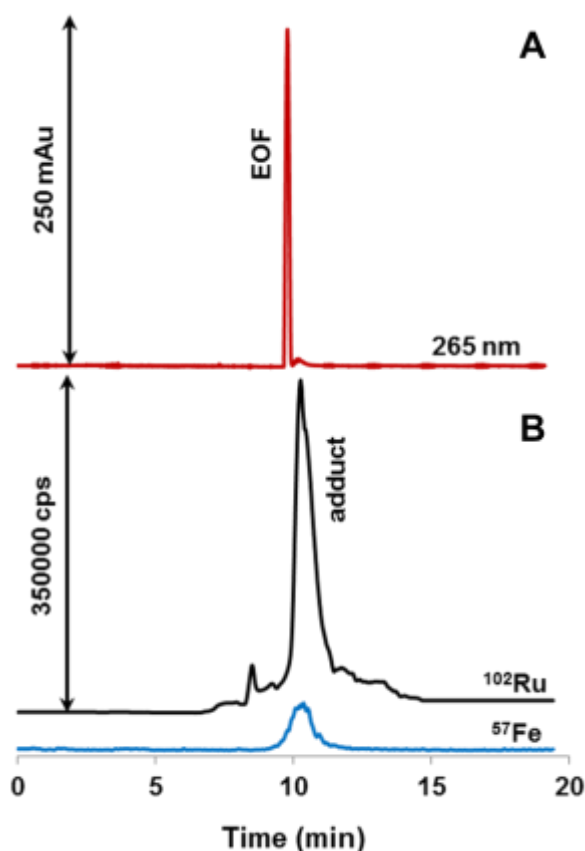

**Figure S1** Comparison between the rate of EOF (A) and the mobility of Ru–transferrin adduct ( $5 \times 10^{-5}$  M).

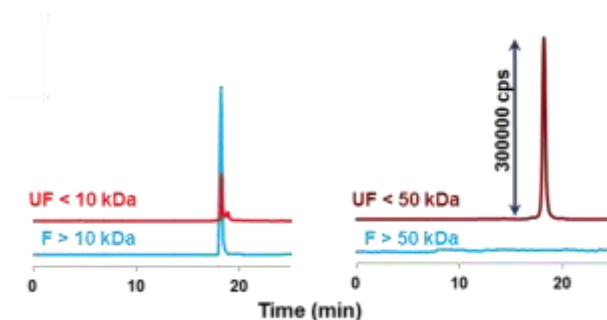

**Figure S2** Electropherograms profiling the effect of glutathione on the Ru distribution between LMM (UF) and HMM (F) fractions (both after 24 h of incubation).
